# Supplementary material for: Deriving column-integrated thermospheric temperature with the N 2 Lyman–Birge–Hopfield (2,0) band
Source: Copernicus journal article supplement (doi:10.5194/amt-2021-75), 2021-05-04

### Updated Figure 5:

The  $T_{\text{MSIS}}$  temperatures have been updated with altitude sampling as a function of both OZA and SZA instead of just SZA like initially performed. This updated sampling results in cooler  $T_{\text{MSIS}}$  temperatures such that there is now the best agreement between  $T_{\text{ci}}^{\text{G}}$  and  $T_{\text{DISK}}$ . The interpretation of Figure 5 is updated in the manuscript. This update does not affect the major conclusions in the manuscript.

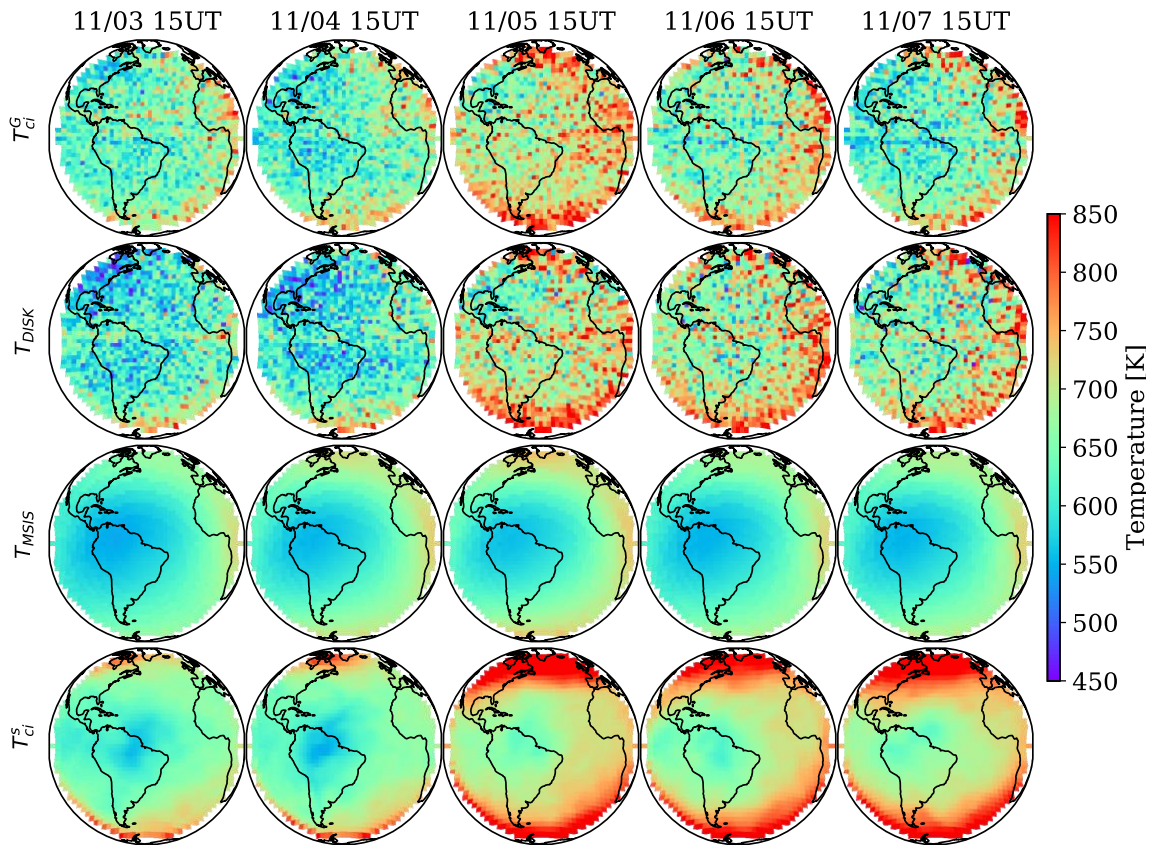

Supplement: Supplementary file [file amt-2021-75-AC3-supplement.pdf]
